# Supplementary material for: Isothermal crystallization kinetics of in situ photo and thermo aged poly(ethylene oxide) using photoDSC
Source: Royal Society of Chemistry journal article supplement (doi:10.1039/b618701c), 2007-01-01
Supplement: b618701c.pdf [file b618701c.pdf]

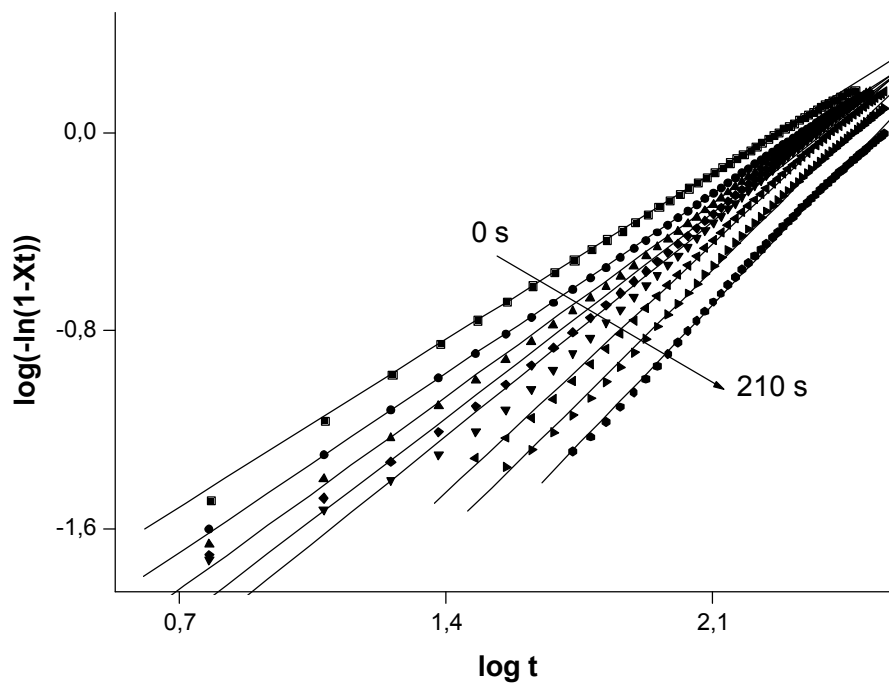

Avrami analysis of the isothermal crystallization data of Photo-aged PEO at 0°C as an aging temperature

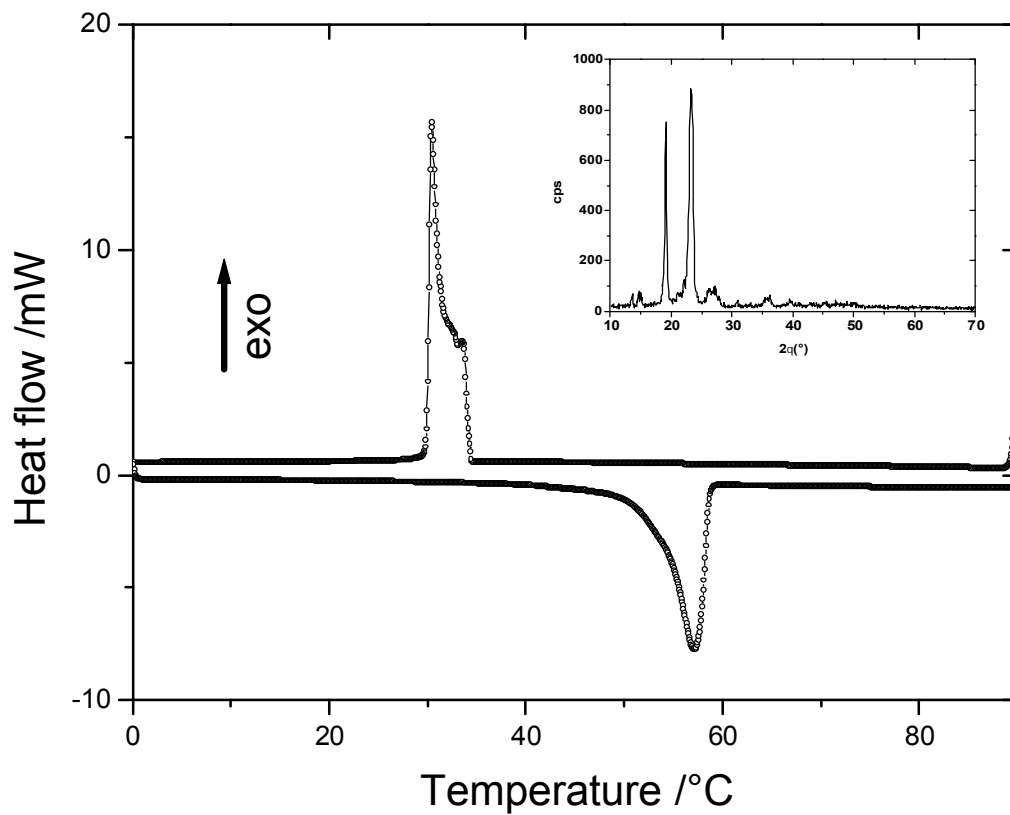

DSC curve of the heating and subsequent cooling of PEO with  $10\text{ }^{\circ}\text{C}\cdot\text{min}^{-1}$  scanning rate. Inset shows the XRD patterns of the studied PEO.

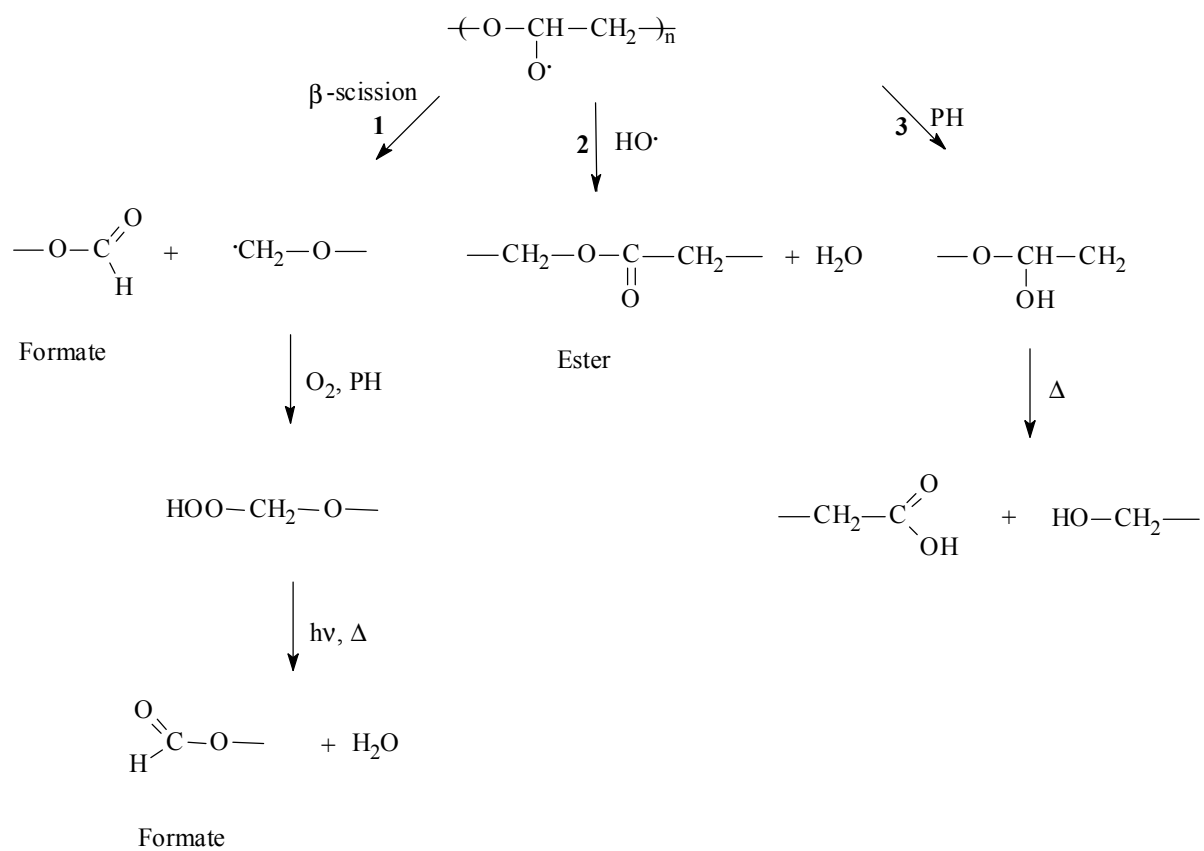

Scheme 1

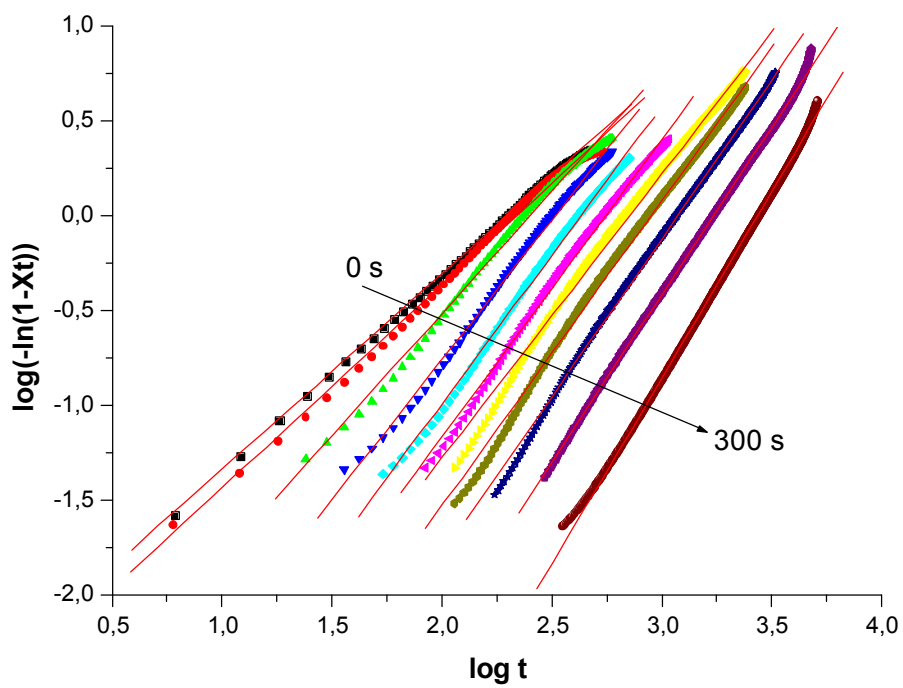

Avrami analysis of the isothermal crystallization data of Photo-aged PEO at 35°C as an aging temperature

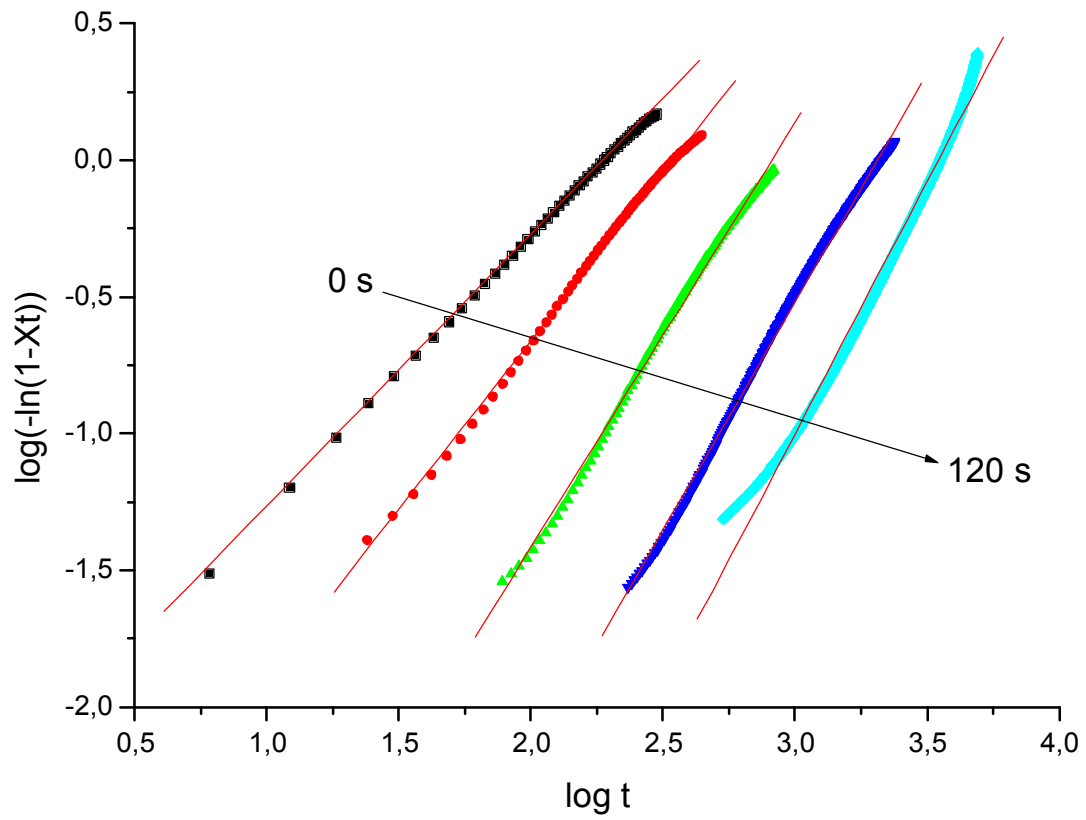

Avrami analysis of the isothermal crystallization data of Photo-aged PEO at 60°C as an aging temperature

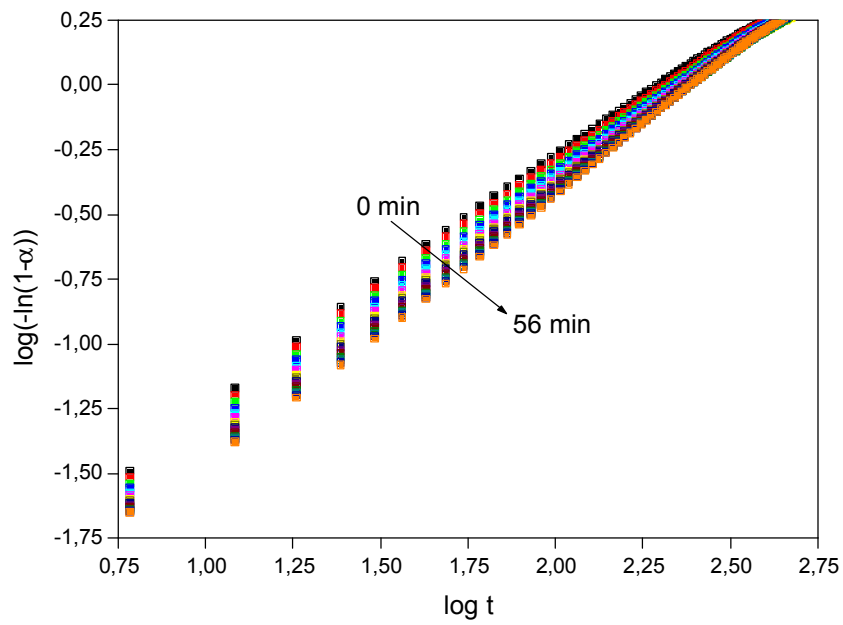

Avrami analysis of the isothermal crystallization data of Thermo-aged PEO at 60°C as an aging temperature

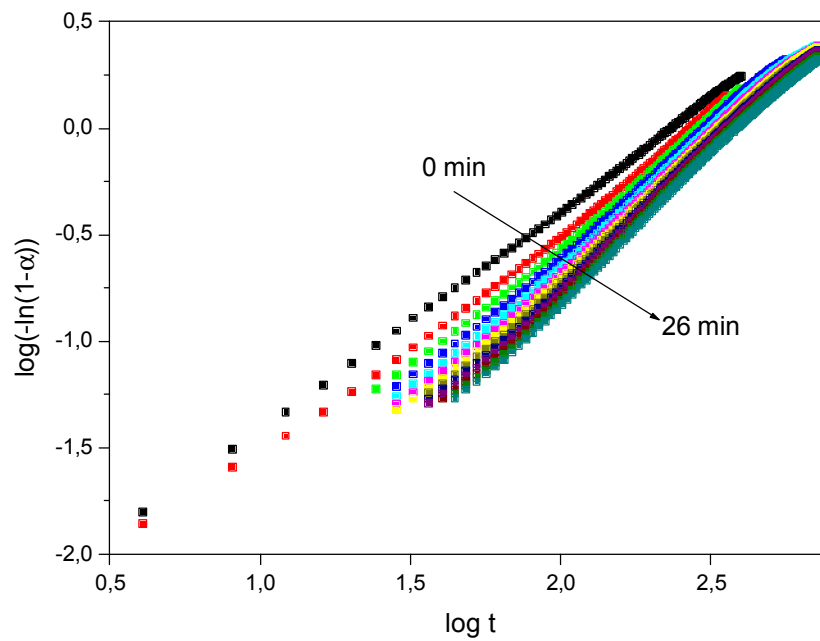

Avrami analysis of the isothermal crystallization data of Thermo-aged PEO at 75°C as an aging temperature

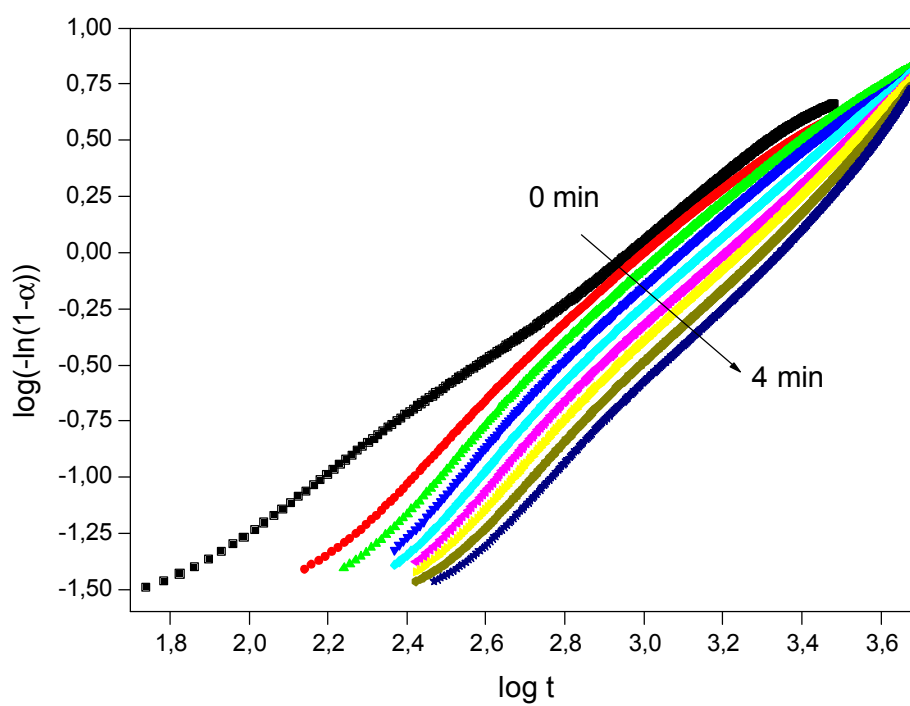

Avrami analysis of the isothermal crystallization data of Thermo-aged PEO at 90°C as an aging temperature
